# Supplementary material for: Prediction of Adult Post-hemorrhagic Hydrocephalus: A Risk Score Based on Clinical Data
Source: Research Square preprint supplement (doi:10.21203/rs.3.rs-1461183/v1), 2022-03-22

| **Multivariate analysis of that p<0.05** | | | |
| --- | --- | --- | --- |
| **Predictors** | **OR** | **95%CI** | **p-value** |
| **Age (yrs)** | 1.067 | 1.038-1.096 | <0.001 |
| **Treatment** | 1.691 | 0.414-7.428 | 0.528 |
| **GCS** | 0.853 | 0.786-0.927 | <0.001 |
| **Types** | 0.780 | 0.189-3.291 | 0.600 |
| **Hypertension** | 1.165 | 0.682-1.992 | 0.575 |
| **Days** | 1.175 | 1.081-1.278 | <0.001 |
| **CSF-TP x time** | 1.000 | 1.000-1.000 | 0.001 |


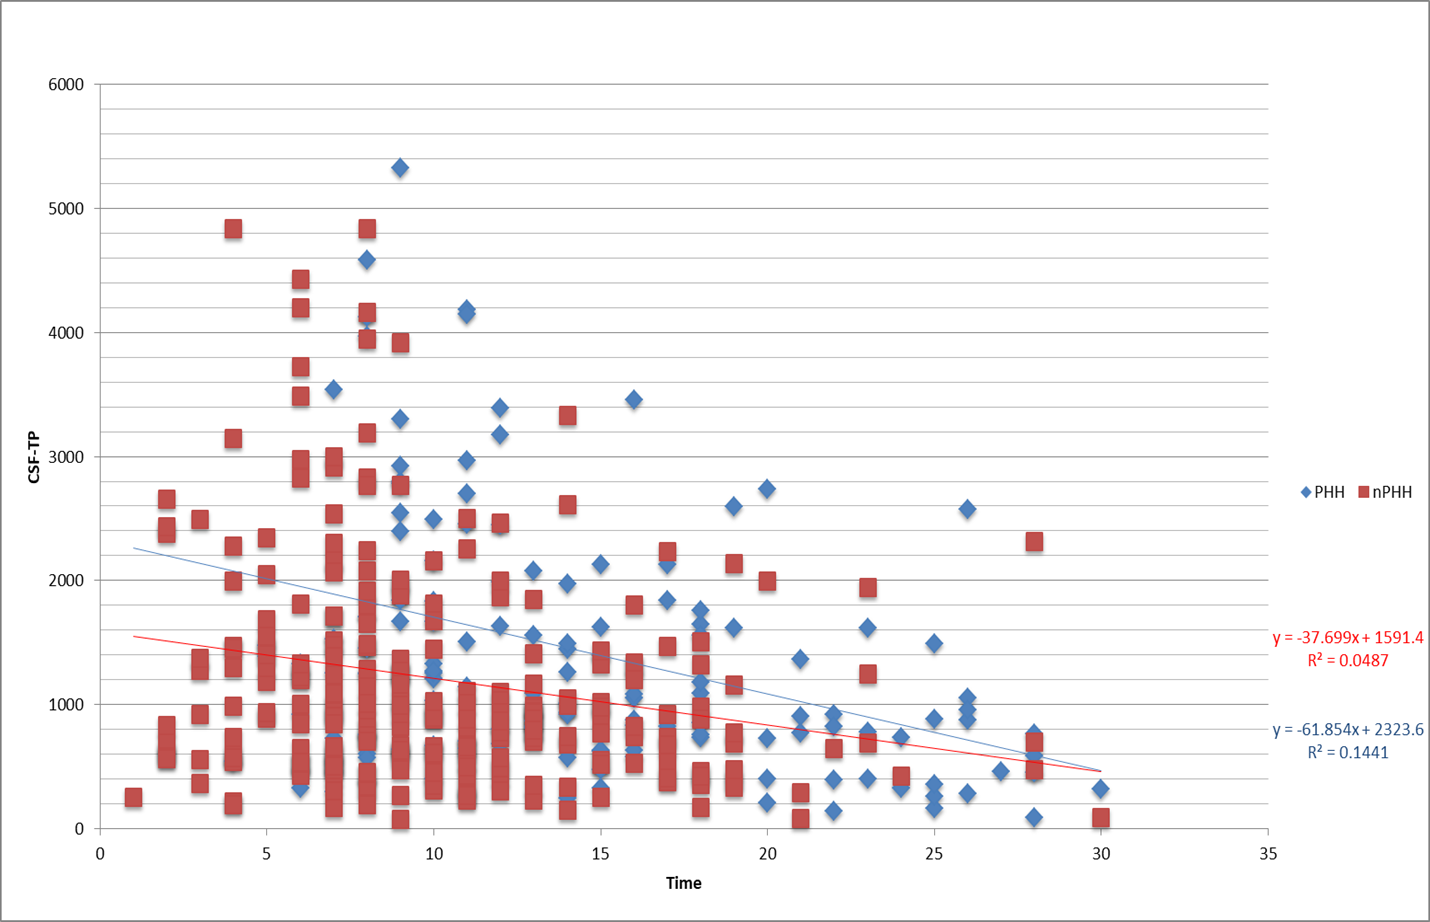


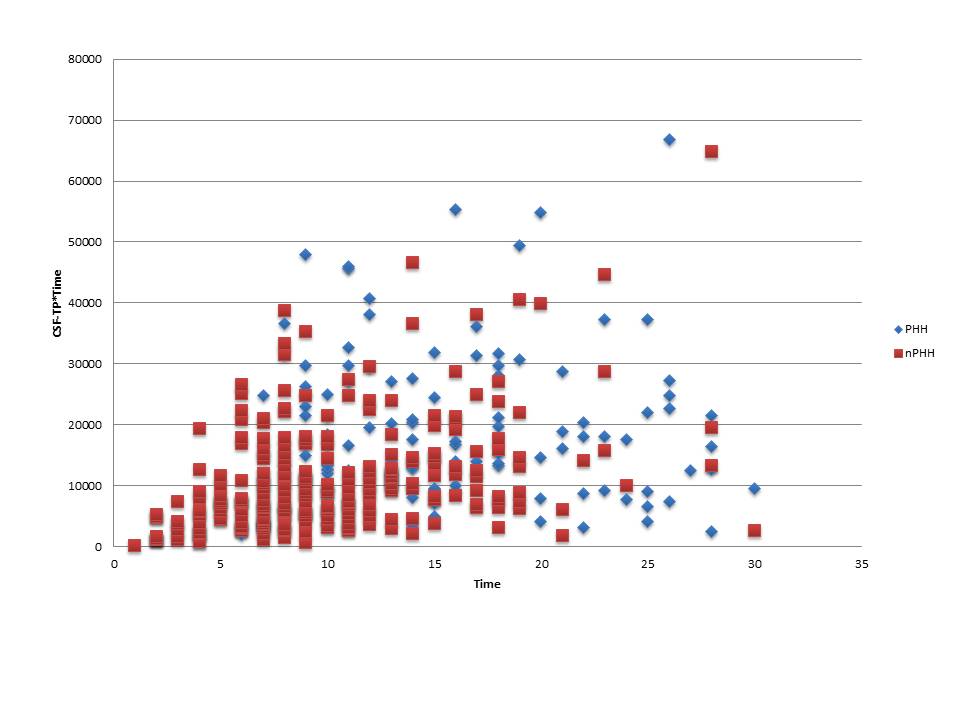


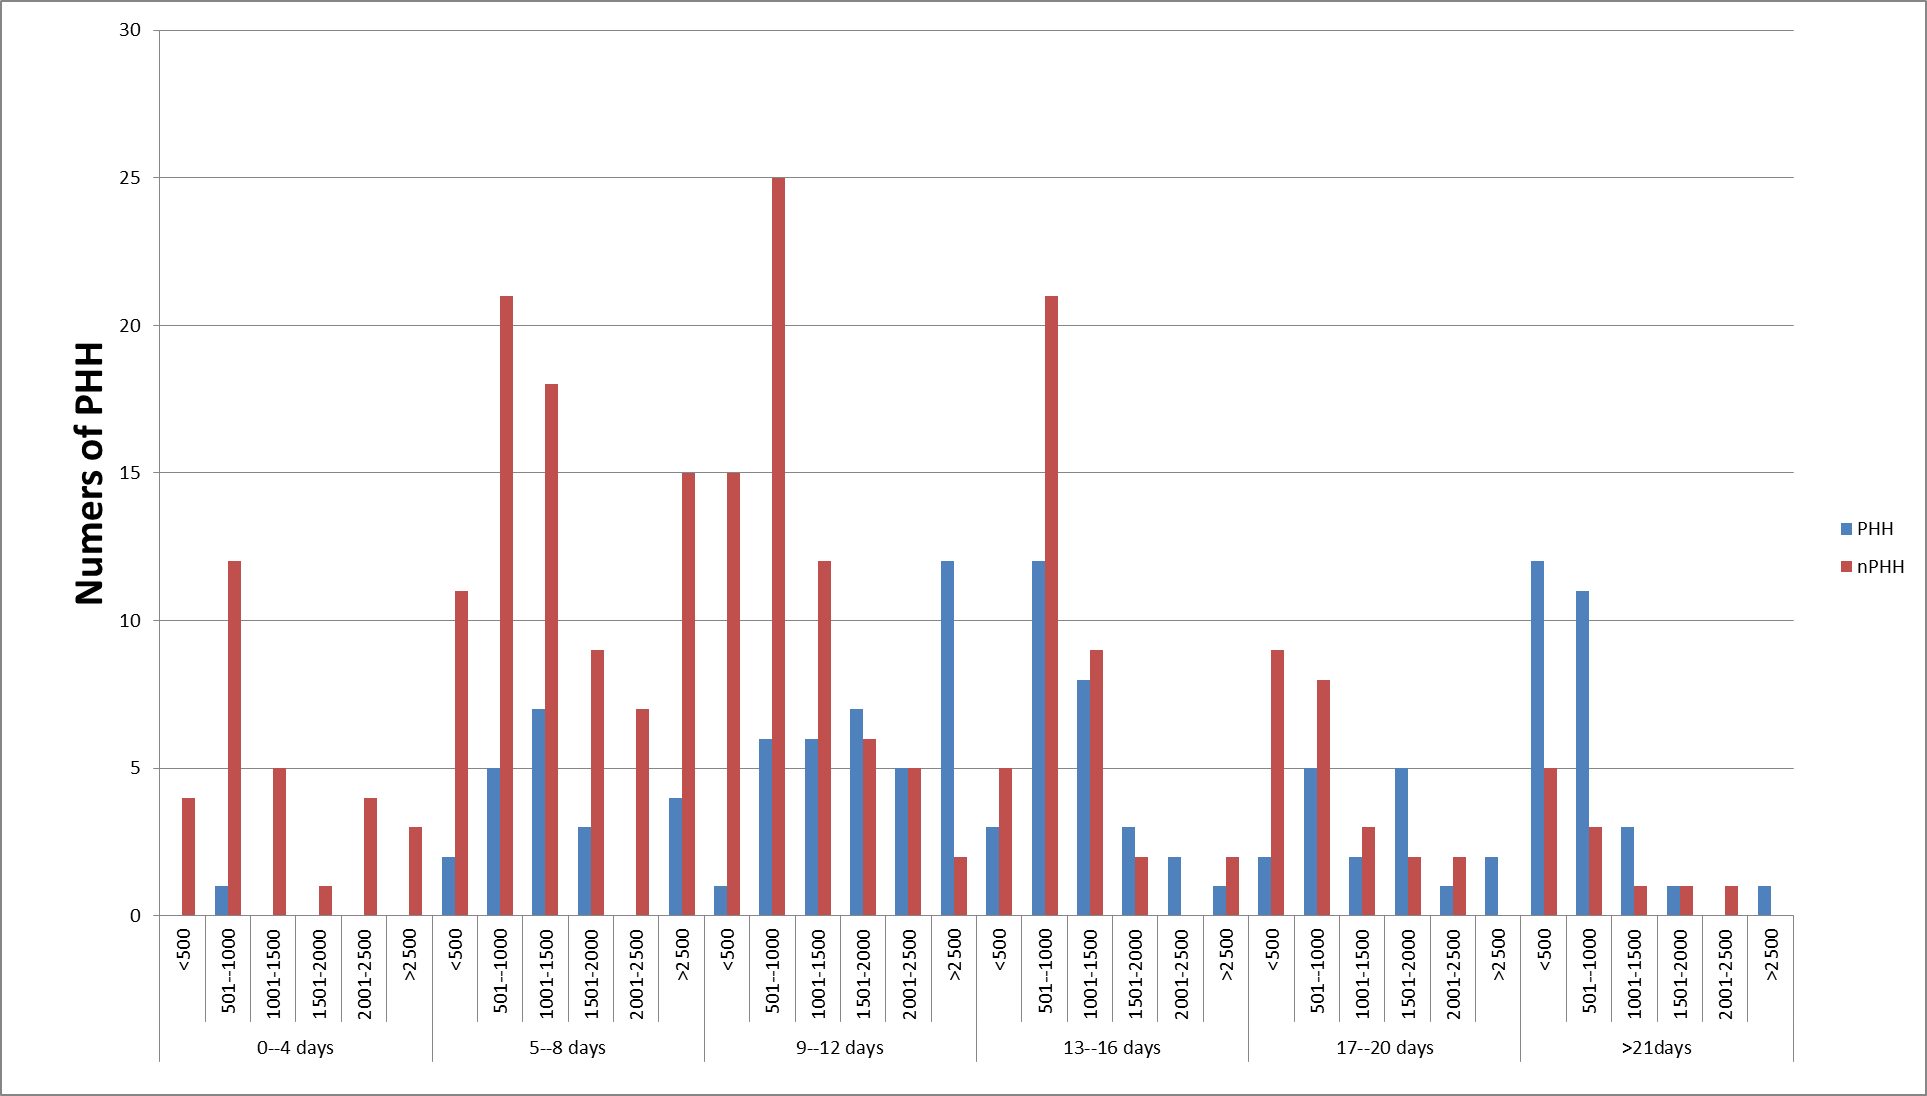

Supplement: Supplementary file 1 [file c494691f4cbcc0c50412179b.docx]
